# Supplementary material for: Direct synthesis of an heterometallic {MnII3CrIII4} wheel by decomposition of Reineckes salt
Source: Royal Society of Chemistry journal article supplement (doi:10.1039/b920375c), 2010-01-01
Supplement: b920375c.pdf [file b920375c.pdf]

## Supplementary material

# Direct Synthesis of Heterometallic $\{\text{Mn}^{\text{II}}_3\text{Cr}^{\text{III}}_4\}$ Wheel by Decomposition of Reineckes Salt

Valentyna V. Semenaka<sup>a</sup>, Oksana V. Nesterova<sup>a</sup>, Volodymyr N. Kokozay<sup>\*a</sup>, Roman I. Zybatyuk<sup>b</sup>, Oleg V. Shishkin<sup>b</sup>, Roman Boča<sup>c</sup>, Denys V. Shevchenko<sup>d</sup>, Ping Huang<sup>d</sup>, Stenbjörn Styring<sup>d</sup>

<sup>a</sup>Department of Inorganic Chemistry, National Taras Shevchenko University, Volodymyrska str. 64, Kyiv 01601, Ukraine. Fax: +380 44 286 2467; Tel: +380 44 235 4371; E-mail: [kokozay@univ.kiev.ua](mailto:kokozay@univ.kiev.ua)

<sup>b</sup>A STC "Institute for Single Crystals" National Academy of Sciences of Ukraine, 60 Lenina Avenue, Kharkiv 61001, Ukraine

<sup>c</sup>Department of Inorganic Chemistry, V.N.Karazin Kharkiv National University, 4 Svobody sq., Kharkiv 61077, Ukraine

<sup>d</sup>Institute of Inorganic Chemistry, FCHPT, Slovak University of Technology, Radlinskeho 9, 812 37 Bratislava, Slovakia

<sup>e</sup>Department of Photochemistry and Molecular Science, Uppsala University, Box 523, SE 751 20, Uppsala, Sweden

## Electrochemistry

Cyclic voltammetry and differential pulse voltammetry were carried out by using an Autolab potentiostat with a GPES electrochemical interface (Eco Chemie). Sample solution (4 cm<sup>3</sup>) was prepared from dmf (Fluka, reagent grade) containing 0.1 M tetrabutylammonium (TBA) hexafluorophosphate (Fluka, electrochemical grade) as supporting electrolyte. A cyclic voltammogram was recorded at a scan rate of 100 mVs<sup>-1</sup>. Differential pulse voltammetry was performed with a scan rate of 20 mVs<sup>-1</sup>, a pulse height of 75 mV and a duration of 40 ms. The working electrode was a glassy carbon disc (diameter 3 mm). Its surface was routinely polished with a 0.05 mm alumina-water slurry on a felt surface, immediately prior to use. A glassy carbon rod served as counter electrode and the reference electrode was an Ag/Ag<sup>+</sup> electrode (a silver wire immersed into 10 mM AgNO<sub>3</sub> in MeCN) with a potential of -0.07 V vs. the ferrocene/ferrocenium (Fc/Fc<sup>+</sup>) couple in dry MeCN. The counter and reference electrodes were in compartments separated from the bulk solution by fritted disks. The potentials reported here are given relative to the Fc/Fc<sup>+</sup> couple. Before all measurements, oxygen was removed by bubbling solvent-saturated argon through the stirred solutions. Samples were kept under argon during measurements.

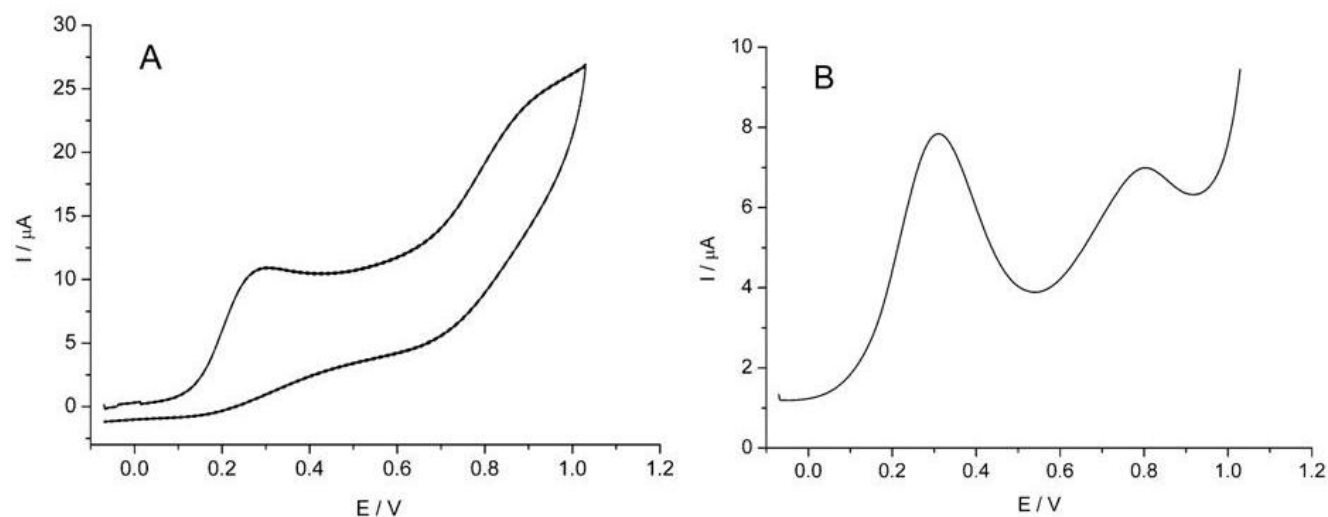

**Fig. S1** Cyclic (A) and differential pulse (B) voltammograms of **1**. Potentials are given vs. the Fc<sup>+0</sup> couple.

The cyclic voltammogram of **1** (Fig. 2A) displays two irreversible oxidation processes, which are attributed to the subsequent one-electron oxidation of the two Mn(II) ions at the rim to Mn(III). The exact values of  $E_{1/2}$ , obtained from differential pulse voltammetry (Fig. 2B), were found to be 0.31 and 0.80 V. As

expected, the central Mn(II) ion does not undergo oxidation in the given potential range. Similar redox behavior has also been observed for other manganese containing wheels  $[\text{NEt}_4]\{\text{Mn}^{\text{II}}[\text{Mn}^{\text{II}}_3\text{Mn}^{\text{III}}_3\text{Cl}_6(\text{L})_6]\}$ ,<sup>1</sup>  $[\text{PPh}_4]\{\text{Mn}^{\text{II}}[\text{Mn}^{\text{II}}_3\text{In}^{\text{III}}_3\text{Cl}_6(\text{L})_6]\}$  and  $\{\text{Mn}^{\text{II}}[\text{Mn}^{\text{II}}_2\text{In}^{\text{III}}_4\text{Cl}_6(\text{L})_6]\}$ <sup>2</sup> (L = RN(CH<sub>2</sub>CH<sub>2</sub>OH), R = CH<sub>3</sub>, Benzyl). The potential displacement of 0.49 V between the individual oxidation reactions of the Mn ions, which are situated in the same coordination environment, indicates intermolecular electronic communication. The electrochemical behavior described above means that the wheel structure of the complex remains intact in solution.

- 1 R.W. Saalfrank, T. Nakajima, N. Mooren, A. Scheurer, H. Maid, F. Hampel, C. Trieflinger and J. Daub, *Eur. J. Inorg. Chem.*, 2005, 1149.
- 2 R.W. Saalfrank, R. Prakash, H. Maid, F. Hampel, F.W. Heinemann, A.X. Trautwein and L.H. Bottger, *Chem. Eur. J.*, 2006, **12**, 2428.
